# Supplementary material for: Television Advertising and Health Insurance Marketplace Consumer Engagement in Kentucky: A Natural Experiment
Source: PubMed Central journal article supplement (PMC6234351; doi:10.2196/10872), 2018-10-25
Supplement: jmir_v20i10e10872_app2.pdf [file jmir_v20i10e10872_app2.pdf]

## Appendix 2. Correlation Matrix

|                                        | Number of kynect ads | Number of insurance company ads | Number of healthcare.gov ads | Number of insurance agency ads | Number of nonprofit ads | Number of other state government ads | Open enrollment period | Week of Thanksgiving | Week of Christmas | Last two weeks before open enrollment | First two weeks of open enrollment | Last two weeks of open enrollment | Number of days in the reporting period |
|----------------------------------------|----------------------|---------------------------------|------------------------------|--------------------------------|-------------------------|--------------------------------------|------------------------|----------------------|-------------------|---------------------------------------|------------------------------------|-----------------------------------|----------------------------------------|
| Number of kynect ads                   | 1.0000               |                                 |                              |                                |                         |                                      |                        |                      |                   |                                       |                                    |                                   |                                        |
| Number of insurance company ads        | 0.5243               | 1.0000                          |                              |                                |                         |                                      |                        |                      |                   |                                       |                                    |                                   |                                        |
| Number of healthcare.gov ads           | 0.4761               | 0.1423                          | 1.0000                       |                                |                         |                                      |                        |                      |                   |                                       |                                    |                                   |                                        |
| Number of insurance agency ads         | 0.2046               | 0.5247                          | 0.2505                       | 1.0000                         |                         |                                      |                        |                      |                   |                                       |                                    |                                   |                                        |
| Number of nonprofit ads                | -0.2085              | -0.1989                         | -0.0077                      | -0.1093                        | 1.0000                  |                                      |                        |                      |                   |                                       |                                    |                                   |                                        |
| Number of other state government ads   | 0.2684               | 0.1957                          | 0.3205                       | 0.3580                         | -0.0805                 | 1.0000                               |                        |                      |                   |                                       |                                    |                                   |                                        |
| Open enrollment period                 | 0.6783               | 0.5660                          | 0.5910                       | 0.5232                         | -0.1931                 | 0.3995                               | 1.0000                 |                      |                   |                                       |                                    |                                   |                                        |
| Week of Thanksgiving                   | -0.0014              | -0.0750                         | 0.0437                       | 0.0491                         | -0.0445                 | 0.0643                               | 0.1782                 | 1.0000               |                   |                                       |                                    |                                   |                                        |
| Week of Christmas                      | 0.1695               | 0.0737                          | 0.1830                       | 0.0589                         | -0.0137                 | 0.0792                               | 0.1782                 | -0.0252              | 1.0000            |                                       |                                    |                                   |                                        |
| Last two weeks before open enrollment  | -0.0726              | -0.0930                         | 0.2371                       | 0.0305                         | 0.0906                  | -0.0978                              | -0.1641                | -0.0292              | -0.0292           | 1.0000                                |                                    |                                   |                                        |
| First two weeks of open enrollment     | 0.1162               | -0.0363                         | 0.3671                       | 0.0558                         | 0.0149                  | 0.0777                               | 0.2552                 | -0.0361              | 0.2086            | -0.0419                               | 1.0000                             |                                   |                                        |
| Last two weeks of open enrollment      | -0.1193              | 0.2132                          | -0.0764                      | 0.1968                         | -0.0191                 | 0.2300                               | 0.2552                 | -0.0361              | -0.0361           | -0.0419                               | -0.0517                            | 1.0000                            |                                        |
| Number of days in the reporting period | -0.0742              | 0.0208                          | -0.0315                      | 0.1290                         | -0.0585                 | 0.2666                               | 0.0305                 | 0.0054               | 0.0054            | -0.1860                               | -0.1505                            | 0.1661                            | 1.0000                                 |
