# Supplementary material for: Television Advertising and Health Insurance Marketplace Consumer Engagement in Kentucky: A Natural Experiment
Source: PubMed Central journal article supplement (PMC6234351; doi:10.2196/10872), 2018-10-25
Supplement: jmir_v20i10e10872_app3.pdf [file jmir_v20i10e10872_app3.pdf]

**Multimedia Appendix 3. Information-seeking behavior models, Kentucky, October 1, 2013–January 31, 2016**

| <b>Covariate</b>                                                 | <i>Beta</i><br><i>(95% confidence interval)</i> |                          |                      |                        |
|------------------------------------------------------------------|-------------------------------------------------|--------------------------|----------------------|------------------------|
|                                                                  | <b>Calls</b>                                    | <b>Page views</b>        | <b>Visits</b>        | <b>Unique visitors</b> |
| Number of kynect ads                                             | -113.2**                                        | -4,222.7                 | -156.7               | -62.0                  |
|                                                                  | (-170.5, -56.0)                                 | (-9,229.5, 784.0)        | (-564.6, 251.2)      | (-312.9, 188.9)        |
| Number of kynect ads x<br>open enrollment period                 | 86.5                                            | 12,195.6**               | 546.9*               | 449.6**                |
|                                                                  | (-1.7, 174.8)                                   | (5,285.4, 19,105.8)      | (56.3, 1,037.5)      | (146.7, 752.5)         |
| Number of insurance company ads                                  | -8.7**                                          | 971.8**                  | 39.7**               | 19.1**                 |
|                                                                  | (-14.9, -2.4)                                   | (489.6, 1,454.0)         | (15.1, 64.4)         | (5.6, 32.7)            |
| Number of insurance company ads x<br>open enrollment period      | 21.3*                                           | -258.0                   | -19.3                | 1.9                    |
|                                                                  | (4.0, 38.5)                                     | (-2,165.6, 1,649.6)      | (-122.8, 84.3)       | (-67.7, 71.4)          |
| Number of healthcare.gov ads                                     | 101.2                                           | 4,661.5                  | 77.0                 | -123.7                 |
|                                                                  | (-22.5, 224.9)                                  | (-7,084.5, 16,407.4)     | (-472.6, 626.5)      | (-361.1, 113.8)        |
| Number of healthcare.gov ads x<br>open enrollment period         | -118.9                                          | -4,796.0                 | -49.4                | 145.1                  |
|                                                                  | (-245.5, 7.7)                                   | (-16,727.1, 7,135.0)     | (-612.9, 514.2)      | (-103.4, 393.6)        |
| Number of insurance agency ads                                   | 47.6                                            | -10,825.6**              | -137.1               | -0.1                   |
|                                                                  | (-57.8, 153.0)                                  | (-17,856.6, -3,794.7)    | (-725.4, 451.2)      | (368.4, 368.3)         |
| Number of insurance agency ads x<br>open enrollment period       | -86.8                                           | 15,471.9**               | 241.9                | 17.3                   |
|                                                                  | (-216.4, 42.8)                                  | (5,104.7, 25,839.1)      | (-471.5, 955.3)      | (-421.8, 456.3)        |
| Number of nonprofit ads                                          | 28.9                                            | -472.5                   | -81.7                | -35.2                  |
|                                                                  | (-40.3, 98.0)                                   | (-2,161.2, 1,216.2)      | (-212.2, 48.8)       | (-113.7, 43.4)         |
| Number of nonprofit ads x<br>open enrollment period              | -226.4*                                         | -29,589.0*               | -890.2               | 1.4                    |
|                                                                  | (-411.1, 41.8)                                  | (-56,776.7, -2,401.3)    | (-2,379.3, 598.8)    | (-1,014.7, 1,017.5)    |
| Number of other state government ads                             | 24.6                                            | 1,870.6                  | 210.1*               | 150.9*                 |
|                                                                  | (-62.0, 111.3)                                  | (-2,379.7, 6,120.8)      | (14.6, 405.6)        | (37.2, 264.6)          |
| Number of other state government ads x<br>open enrollment period | 191.2**                                         | -2,651.8                 | -209.6               | -357.1**               |
|                                                                  | (85.2, 297.3)                                   | (-9,975.0, 4,671.5)      | (-593.3, 174.1)      | (-612.6, 101.7)        |
| Open enrollment period                                           | 6,353.7*                                        | 614,110.9                | 29,021.2             | 10,977.3               |
|                                                                  | (167.9, 12,539.5)                               | (-84,740.1, 1,312,962.0) | (-6,820.7, 64,863.1) | (-9,200.2, 31,154.9)   |

|                                        |                                     |                                          |                                       |                                       |
|----------------------------------------|-------------------------------------|------------------------------------------|---------------------------------------|---------------------------------------|
| Week of Thanksgiving                   | -9,058.8**<br>(-14,607.5, -3,510.0) | -774,472.7**<br>(-950,214.9, -598,730.5) | -39,814.8**<br>(-52,318.2, -27,311.3) | -23,955.8**<br>(-31,921.1, -15,990.5) |
| Week of Christmas                      | -8,375.9**<br>(-13,893.2, -2,858.7) | -251,521.5<br>(-1,280,231.0, 777,188.4)  | -13,993.2<br>(-63,518.5, 35,532.2)    | -381.9<br>(-37,288.1, 36,524.2)       |
| Last two weeks before open enrollment  | -116.1<br>(-2,327.3, 2,095.2)       | 6,629.0<br>(-194,436.8, 207,694.7)       | -4,710.7<br>(-23,833.6, 14,412.2)     | -2,518.2<br>(-14,564.8, 9,528.4)      |
| First two weeks of open enrollment     | 1,512.3<br>(-1,942.6, 4,967.1)      | 404,244.2<br>(-44,398.4, 852,886.8)      | 34,109.6*<br>(6,398.1, 61,821.1)      | 27,707.9**<br>(8,129.9, 47,285.9)     |
| Last two weeks of open enrollment      | 4,409.7<br>(-1,091.7, 9,911.1)      | 939,001.5**<br>(301,538.1, 1,576,465.0)  | 40,720.5*<br>(4,544.8, 76,896.3)      | 21,530.9*<br>(1,342.0, 41,719.8)      |
| Number of days in the reporting period | -3,104.3*<br>(-6,060.5, -148.1)     | -240,963.4<br>(-790,110.5, 308,183.7)    | -38,921.5*<br>(-76,014.4, -1,828.7)   | -24,430.7<br>(-50,480.0, 1,618.6)     |
| Number of observations (state-weeks)   | 122                                 | 122                                      | 122                                   | 122                                   |
| R <sup>2</sup>                         | 0.75                                | 0.81                                     | 0.79                                  | 0.80                                  |

\* P<.05, \*\* P<.01
