# Supplementary material for: Television Advertising and Health Insurance Marketplace Consumer Engagement in Kentucky: A Natural Experiment
Source: PubMed Central journal article supplement (PMC6234351; doi:10.2196/10872), 2018-10-25
Supplement: jmir_v20i10e10872_app4.pdf [file jmir_v20i10e10872_app4.pdf]

**Multimedia Appendix 4. Enrollment activity models, Kentucky, October 1, 2013–January 31, 2016**

| <i>Beta</i><br>(95% confidence interval)                                |                                 |                                 |                                 |
|-------------------------------------------------------------------------|---------------------------------|---------------------------------|---------------------------------|
| <b>Covariate</b>                                                        | <b>Online applications</b>      | <b>Total applications</b>       | <b>Enrollment</b>               |
| Number of kynect ads                                                    | 19.0<br>(-51.0, 88.9)           | 29.0<br>(-25.9, 83.9)           | 108.9<br>(-17.5, 235.3)         |
| Number of kynect ads <i>x</i><br>open enrollment period                 | 42.4<br>(-49.1, 134.0)          | 26.8<br>(-48.6, 102.3)          | -128.9<br>(-272.9, 15.2)        |
| Number of insurance company ads                                         | 1.5<br>(-11.0, 14.1)            | -4.0<br>(-12.1, 4.0)            | 6.0<br>(-0.9, 12.9)             |
| Number of insurance company ads <i>x</i><br>open enrollment period      | -18.2<br>(-45.4, 8.9)           | -4.1<br>(-25.0, 16.8)           | 12.3<br>(-13.1, 37.7)           |
| Number of healthcare.gov ads                                            | 51.5<br>(-95.5, 198.4)          | -26.1<br>(-123.5, 71.3)         | 72.1<br>(-18.6, 162.8)          |
| Number of healthcare.gov ads <i>x</i><br>open enrollment period         | -39.5<br>(-189.2, 110.3)        | 34.2<br>(-66.2, 134.5)          | -72.4<br>(-163.2, 18.5)         |
| Number of insurance agency ads                                          | -107.3<br>(-327.1, 112.5)       | -1.7<br>(-166.7, 163.3)         | -150.8<br>(-327.9, 26.3)        |
| Number of insurance agency ads <i>x</i><br>open enrollment period       | 218.7<br>(-19.3, 456.6)         | 78.0<br>(-105.5, 261.5)         | 105.6<br>(-78.8, 290.0)         |
| Number of nonprofit ads                                                 | -61.7**<br>(-90.5, -32.9)       | -27.7<br>(-60.5, 5.1)           | 26.1<br>(-16.7, 68.9)           |
| Number of nonprofit ads <i>x</i><br>open enrollment period              | -63.9<br>(-340.9, 213.1)        | -208.5<br>(-450.0, 33.0)        | -98.0<br>(-394.4, 198.5)        |
| Number of other state government ads                                    | -116.3**<br>(-179.3, -53.2)     | -59.7*<br>(-115.0, -4.4)        | -46.6<br>(-104.2, 11.0)         |
| Number of other state government ads <i>x</i><br>open enrollment period | -6.5<br>(-99.3, 86.3)           | -22.4<br>(-103.2, 58.3)         | 18.0<br>(-98.7, 134.7)          |
| Open enrollment period                                                  | 3,307.5<br>(-5,673.5, 12,288.5) | 3,851.8<br>(-3,368.4, 11,072.1) | 4,447.0<br>(-2,833.5, 11,727.3) |

|                                        |                      |                      |                      |
|----------------------------------------|----------------------|----------------------|----------------------|
| Week of Thanksgiving                   | -3,434.1*            | -4,523.4**           | -7,897.1             |
|                                        | (-6,464.3, -404.0)   | (-6,958.5, -2,088.3) | (-21,204.2, 5,410.0) |
| Week of Christmas                      | -1,057.4             | -2,669.1             | -1,390.8             |
|                                        | (-8,622.7, 6,507.8)  | (-10,054.2, 4,715.9) | (-4,857.0, 2,075.4)  |
| Last two weeks before open enrollment  | -604.6               | -990.2               | -122.9               |
|                                        | (-3,486.6, 2,277.3)  | (-3,125.7, 1,145.2)  | (-5,603.2, 5,357.4)  |
| First two weeks of open enrollment     | 814.1                | 537.5                | 17,592.3             |
|                                        | (-2,969.1, 4,597.2)  | (-4,240.1, 5,315.1)  | (-3,502.8, 38,687.4) |
| Last two weeks of open enrollment      | 4,266.3              | 5,364.9              | 214.0                |
|                                        | (-3,009.5, 11,542.1) | (-643.3, 11,373.0)   | (-5,254.9, 5,682.9)  |
| Number of days in the reporting period | -835.6               | -35.8                | 15,295.2             |
|                                        | (-4,682.4, 3,011.1)  | (-5,057.5, 4,985.9)  | (-1,127.1, 31,717.5) |
| Number of observations (state-weeks)   | 122                  | 122                  | 122                  |
| R <sup>2</sup>                         | 0.56                 | 0.58                 | 0.56                 |

\* P<.05, \*\* P<.01
